# Supplementary material
Source: PubMed Central journal article supplement (PMC6613089)
Supplement: pnas.1903230116.sapp.pdf [file pnas.1903230116.sapp.pdf]

## Supplementary Information for

### **Direct delivery of adenoviral CRISPR/Cas9 vector into the blastoderm for generation of targeted gene knockout in quail**

Joonbum Lee, Jisi Ma, Kichoon Lee

Corresponding to Kichoon Lee  
Email: [lee.2626@osu.edu](mailto:lee.2626@osu.edu)

#### **This PDF file includes:**

Figs. S1 to S3  
Tables S1 to S2

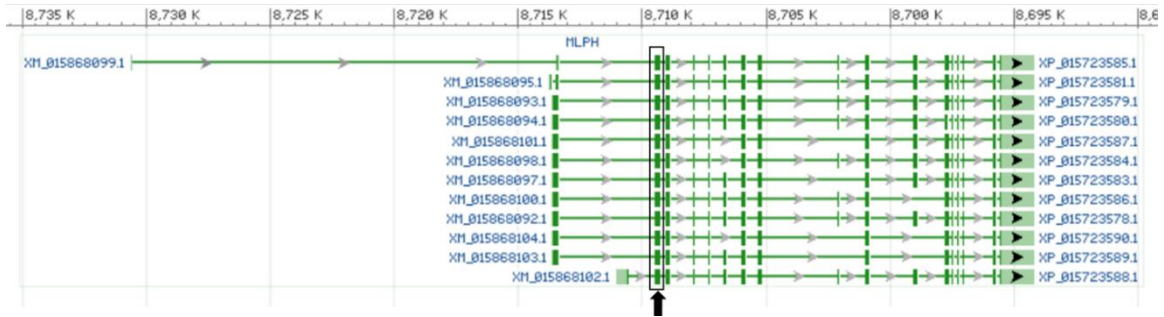

**Fig. S1. Diagrammatic representation of multiple transcripts of the Japanese quail *MLPH* gene and *MLPH* gRNA region.** A part of the ‘Genomic regions, transcripts, and products’ section was acquired from the NCBI Gene record for Japanese quail *MLPH* (Gene ID 107316507). The exons containing gRNA target sequences are boxed and directed by an arrow. Dark and light green boxes indicate translated and untranslated regions, respectively.

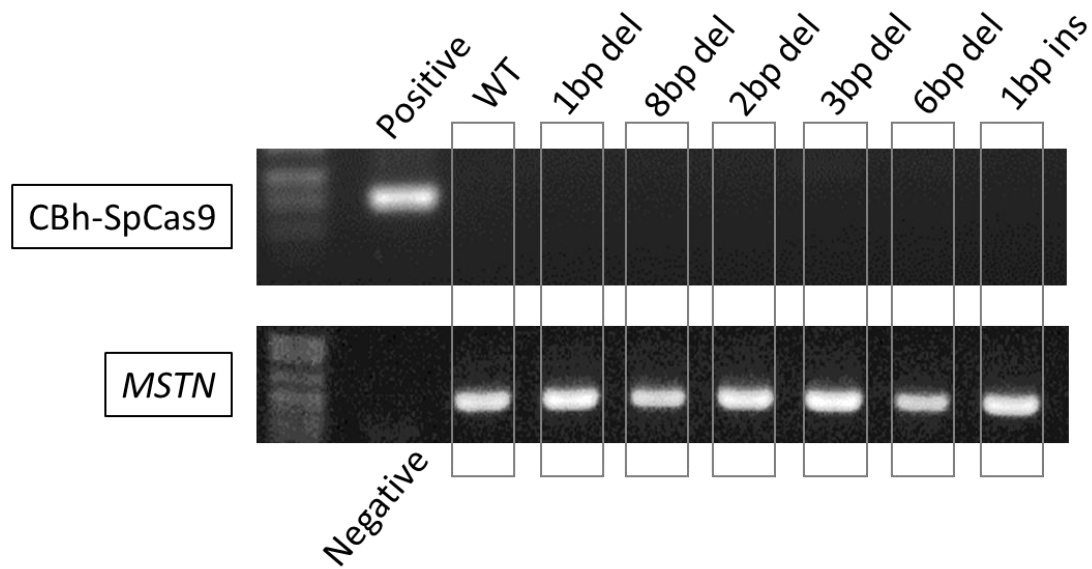

**Fig. S2. Detection of chromosomal integration of the viral vector into the host genome.** PCR amplification of a portion of the viral sequences, CBh promoter-Cas9, and the myostatin (*MSTN*) gene in all mutant quail genomic DNAs are shown. The adenoviral shuttle vector was used as a positive control and PCR master mix without genomic DNA was used as a negative control. Genomic DNA from wild-type quail (WT) was included to so that there was a negative control in viral vector detection and a positive control in *MSTN* gene amplification.

Bright Field + GFP

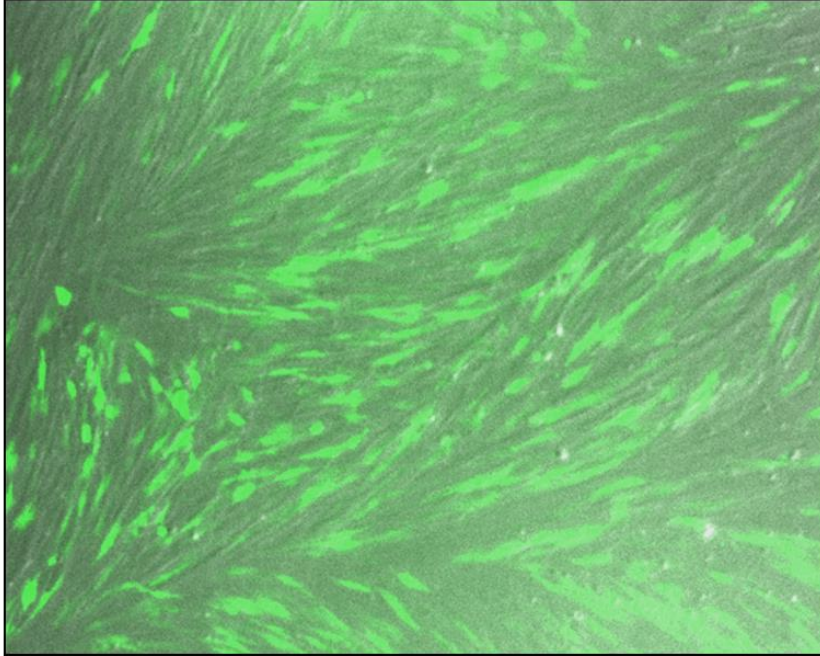

**Fig. S3. Adenovirus-mediated green fluorescent protein (GFP) gene expression in the primary turkey muscle cells.** Both GFP negative and positive cells are shown using a bright field with a fluorescent light microscopy.

**Table S1. Potential off-target sites of *MLPH* in Japanese quail genome.**

|              | Chromosome                | Locus      | Score | Sequence*                             | PAM | Direction |
|--------------|---------------------------|------------|-------|---------------------------------------|-----|-----------|
| <i>MLPH</i>  | 7                         | 8,709,348  | 46.1  | AGGTGTAGAAGCGGCAATCC                  | AGG | -         |
| off-target 1 | 3                         | 51,763,707 | 30.2  | CCTGAACTAAGCGGCAATCC                  | AGG | +         |
| off-target 2 | 18                        | 17,397     | 30.2  | <u>TG</u> A <u>IT</u> GCTAAGCGGCAATCC | TGG | +         |
| off-target 3 | 12                        | 17,221,856 | 30.2  | <u>TG</u> A <u>IT</u> GCTAAGCGGCAATCC | TGG | +         |
| off-target 4 | unplaced genomic scaffold | 7,095      | 30.2  | <u>TG</u> A <u>IT</u> GCTAAGCGGCAATCC | TGG | +         |
| off-target 5 | 18                        | 1,841,485  | 28.2  | CTC <u>IT</u> TAGAAGCGGCAATAC         | AGG | -         |
| off-target 6 | Z                         | 402,850    | 28.2  | CTAA <u>A</u> TCACAGCGGCAATCC         | AGG | -         |

\*Identical nucleotides in potential off-target sites are underlined.

**Table S2. List of primers used in the present study.**

| Purpose           | Forward (5'-3')                | Reverse (5'-3')            |
|-------------------|--------------------------------|----------------------------|
| <i>MLPH</i>       | GACCTGAAGTGCAAGATAGACCA        | CTAGAAGAGCTGAATCCCCTTC     |
|                   | CACCAGTCCCACCTGAATGAA          | AGCTTGCAGGACAGCAGAAA       |
| Off-target 1      | CTCCCTCATTTTCTTCTGCTGTCTT      | TCACTTGTAGGAAAGGCATTCTAGGA |
| Off-target 2      | GAGGACTTACCTATTTGGGACTTGATATAT | ACGTGAAGCCAACCACTTCA       |
| Off-target 3      | GACGTAGCCCCGGGGTTT             | CCGCCCCACCCCAAAT           |
| Off-target 4      | GGTGACGTAGCCCCATGGTCTT         | GCTTCTATTTATTGCCCGCCACACA  |
| Off-target 5      | CACATCCCTCACAACCTCCCTCTT       | GAACCTCCAGGCCTCTGCTATTT    |
| Off-target 6      | GGGAAGACAGCGCACTTATATTTATCAA   | GAGCACTCAGAGGTTGGTGAAA     |
| <i>MSTN</i>       | TGTGATCGACAGGGCTTTAAC          | CGCAGTTTGCTGAGGATTTGAA     |
| CBh promoter-Cas9 | GCTCTGACTGACCGCCTTACT          | GTTGCCCAGCACCTTGAATT       |
